# Supplementary material for: Weekly Self-Ratings of Treatment Involvement and Their Relation to Symptom Reduction in Internet Cognitive Behavioral Therapy for Insomnia
Source: Springer Nature journal article supplement (doi:10.1007/s10608-020-10151-y), 2020-09-16
Supplement: MOESM1 [file 18388010]

**Table S1** Regression analyses of involvement markers from all treatment weeks as predictors of insomnia severity, controlled for amount of weekly measures as a sensitivity analysis.

|  | Insomnia treatment (ICBT-i) n=67 | | | Control treatment (ICBT-ctrl) n=63 | | |
| --- | --- | --- | --- | --- | --- | --- |
|  | *ΔR2* | β | | *ΔR2* | β | |
| Step 2a  ISI pre score  Amount of weekly measures  Time spent | 0.01 | | 0.16  0.07  -0.12 | 0.02 | | 0.34**  -0.01  0.16 |
| Step 2b  ISI pre score  Amount of weekly measures  Text read | 0.06* | | 0.17  -0.08  -0.32* | 0.00 | | 0.36**  -0.03  0.02 |
| Step 2c  ISI pre score  Amount of weekly measures  Subjective knowledge gain | 0.10** | | 0.20  -0.14  -0.42** | 0.04 | | 0.40**  -0.15  -0.23 |
| Step 2d  ISI pre score  Amount of weekly measures  Homework quantity | 0.01 | | 0.13  0.08  -0.12 | 0.00 | | 0.35**  -0.01  0.06 |
| Step 2e  ISI pre score  Amount of weekly measures  Homework quality | 0.10** | | 0.18  -0.03  -0.36** | 0.03 | | 0.42**  -0.06  -0.19 |

**p* < 0.05. ***p* < 0.01. ****p* < 0.001.

**Table S2** Regression analyses of involvement markers from week 1 to 4 as predictors of insomnia severity, controlled for amount of weekly measures as a sensitivity analysis.

|  | Insomnia treatment (ICBT-i) n=67 | | | Control treatment (ICBT-ctrl) n=63 | | |
| --- | --- | --- | --- | --- | --- | --- |
|  | *ΔR2* | β | | *ΔR2* | β | |
| Step 2a  ISI pre score  Amount of weekly measures  Time spent | 0.01 | | 0.16  0.06  -0.10 | 0.03 | | 0.32*  -0.16  0.18 |
| Step 2b  ISI pre score  Amount of weekly measures  Text read | 0.04 | | 0.16  -0.01  -0.22 | 0.01 | | 0.35**  -0.24  -0.11 |
| Step 2c  ISI pre score  Amount of weekly measures  Subjective knowledge gain | 0.15** | | 0.22  -0.14  -0.46** | 0.03 | | 0.38**  -0.21  -0.18 |
| Step 2d  ISI pre score  Amount of weekly measures  Homework quantity | 0.00 | | 0.13  0.08  -0.05 | 0.00 | | 0.33*  -0.14  0.05 |
| Step 2e  ISI pre score  Amount of weekly measures  Homework quality | 0.05 | | 0.18  0.04  -0.24 | 0.08* | | 0.49***  -0.20  -0.31* |

**p* < 0.05. ***p* < 0.01. ****p* < 0.001.

**Table S3** Regression analyses of involvement markers from week 5 to 8 as predictors of insomnia severity, controlled for amount of weekly measures as a sensitivity analysis.

|  | Insomnia treatment (ICBT-i) n=67 | | | Control treatment (ICBT-ctrl) n=63 | | |
| --- | --- | --- | --- | --- | --- | --- |
|  | *ΔR2* | β | | *ΔR2* | β | |
| Step 2a  ISI pre score  Amount of weekly measures  Time spent | 0.01 | | 0.15  0.06  -0.13 | 0.01 | | 0.36**  0.08  0.09 |
| Step 2b  ISI pre score  Amount of weekly measures  Text read | 0.05 | | 0.15  -0.11  -0.33 | 0.01 | | 0.36**  0.12  0.11 |
| Step 2c  ISI pre score  Amount of weekly measures  Subjective knowledge gain | 0.03 | | 0.16  -0.04  -0.25 | 0.04 | | 0.40**  -0.11  -0.23 |
| Step 2d  ISI pre score  Amount of weekly measures  Homework quantity | 0.03 | | 0.12  0.02  -0.19 | 0.00 | | 0.35**  0.06  0.06 |
| Step 2e  ISI pre score  Amount of weekly measures  Homework quality | 0.27*** | | 0.11  -0.26*  -0.57*** | 0.00 | | 0.37**  0.08  0.02 |

**p* < 0.05. ***p* < 0.01. ****p* < 0.001.
